# Supplementary material for: GC-MS Based Plasma Metabolomics for Identification of Candidate Biomarkers for Hepatocellular Carcinoma in Egyptian Cohort
Source: PubMed Central journal article supplement (PMC4452085; doi:10.1371/journal.pone.0127299), 2015-06-01
Supplement: pone.0127299.s002.pdf [file pone.0127299.s002.pdf]

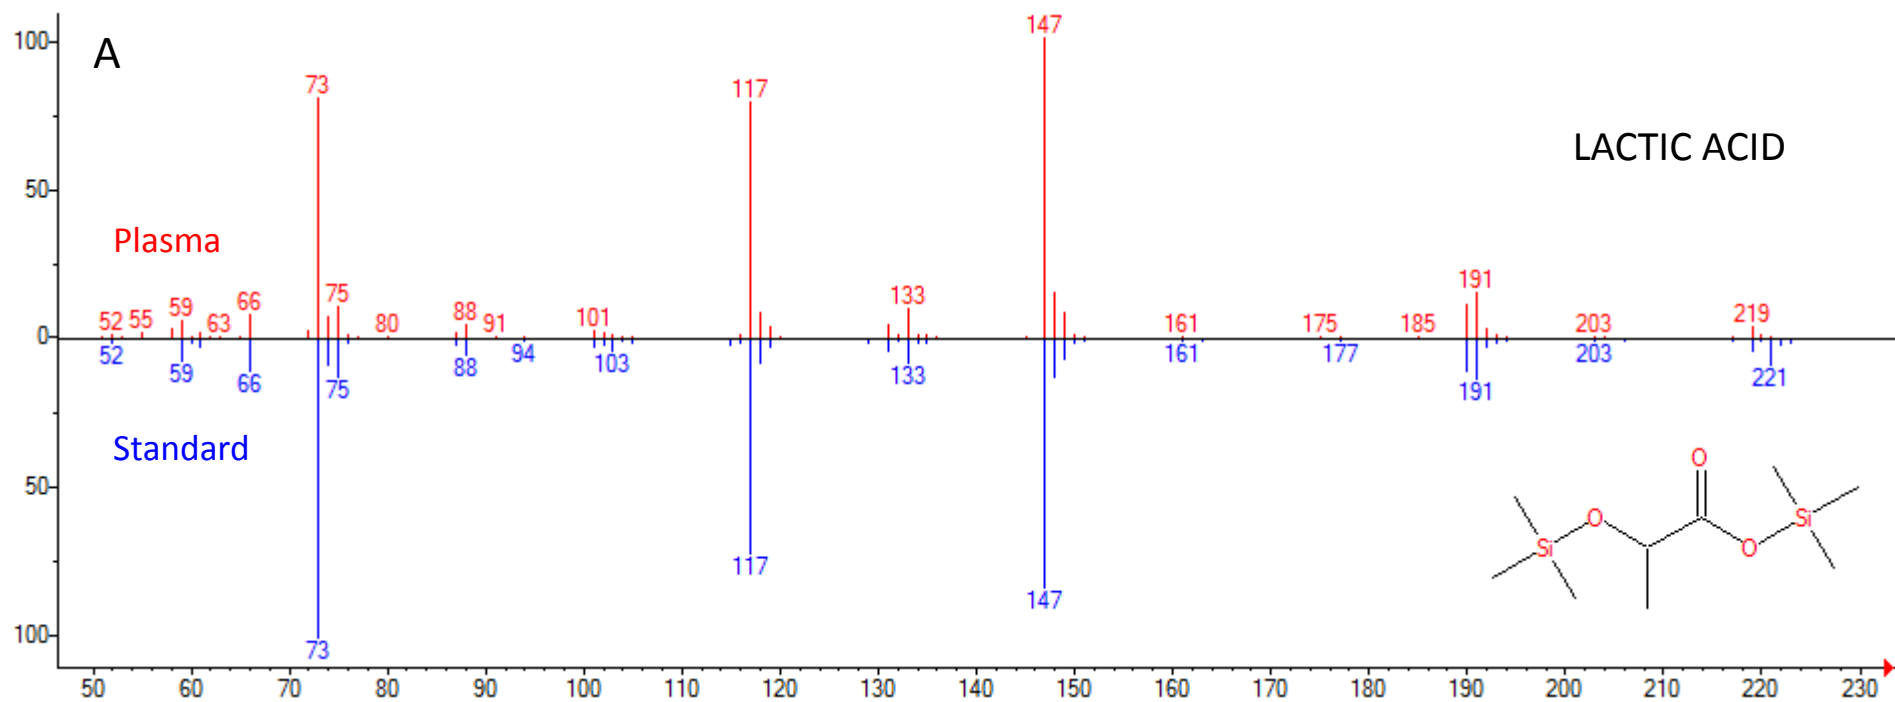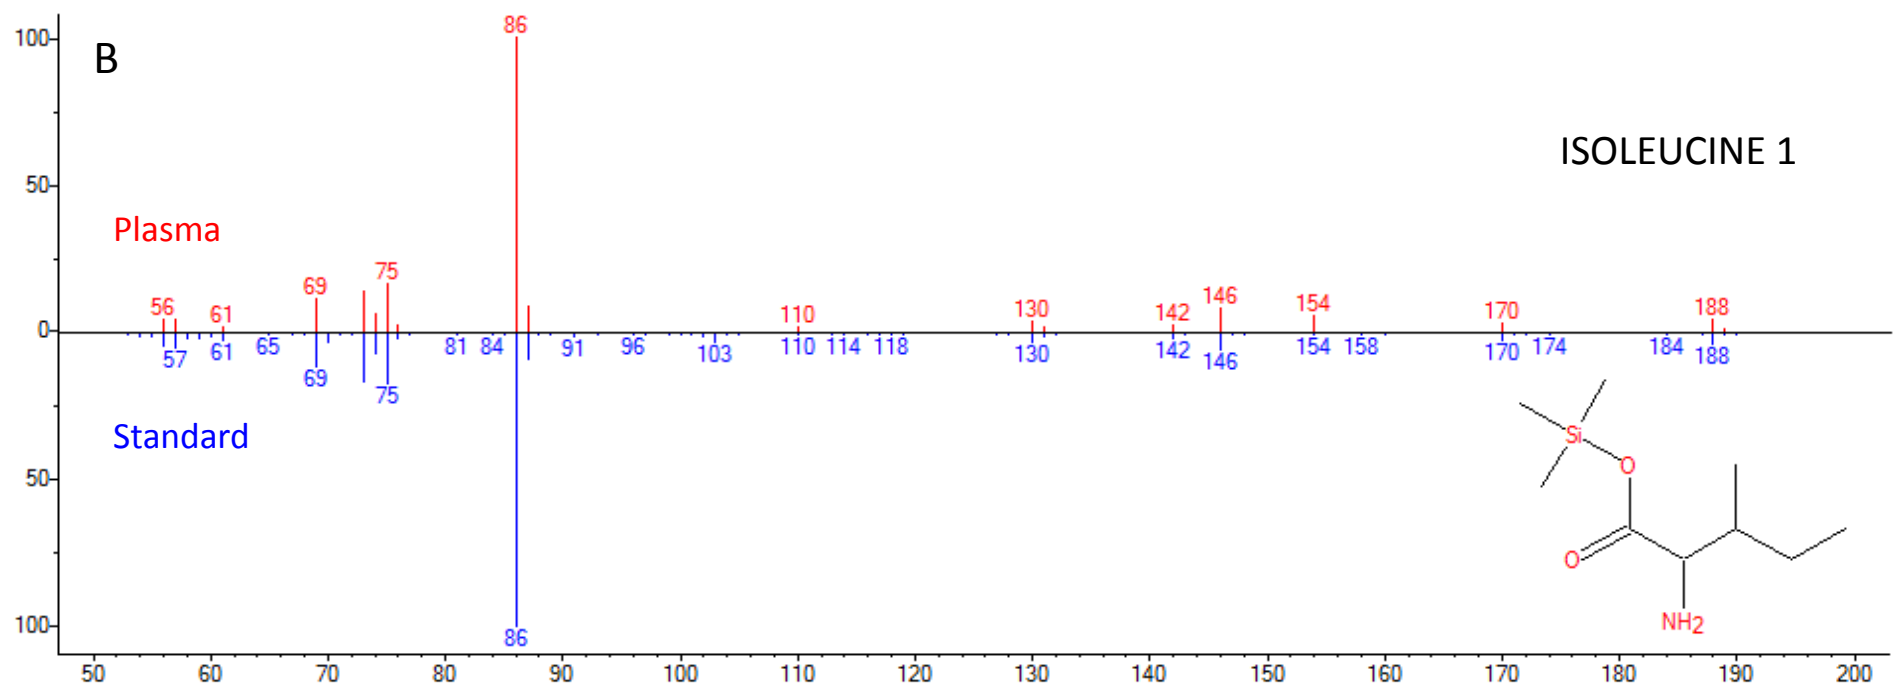

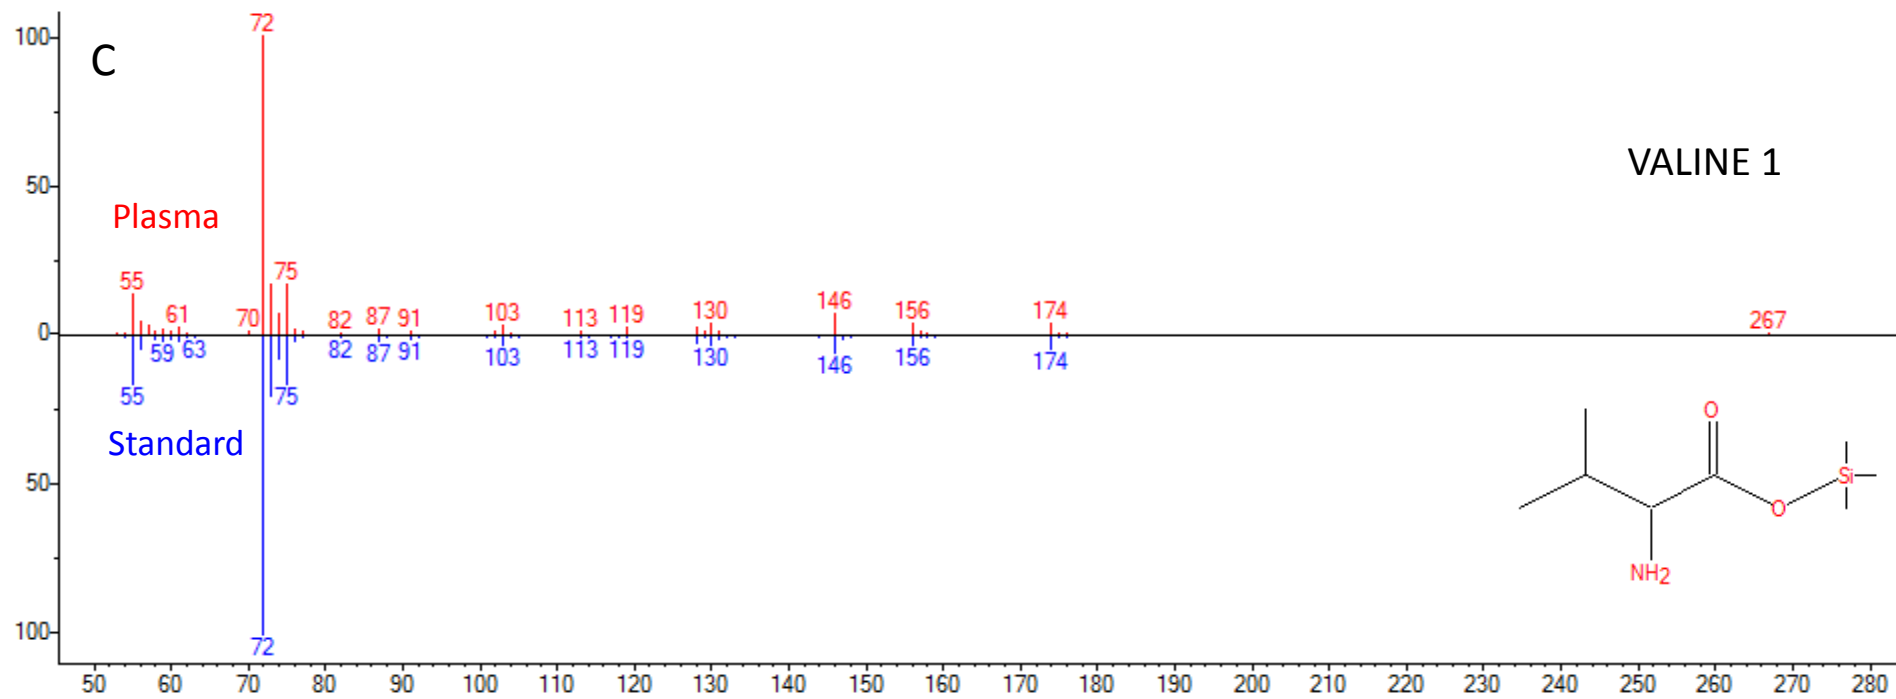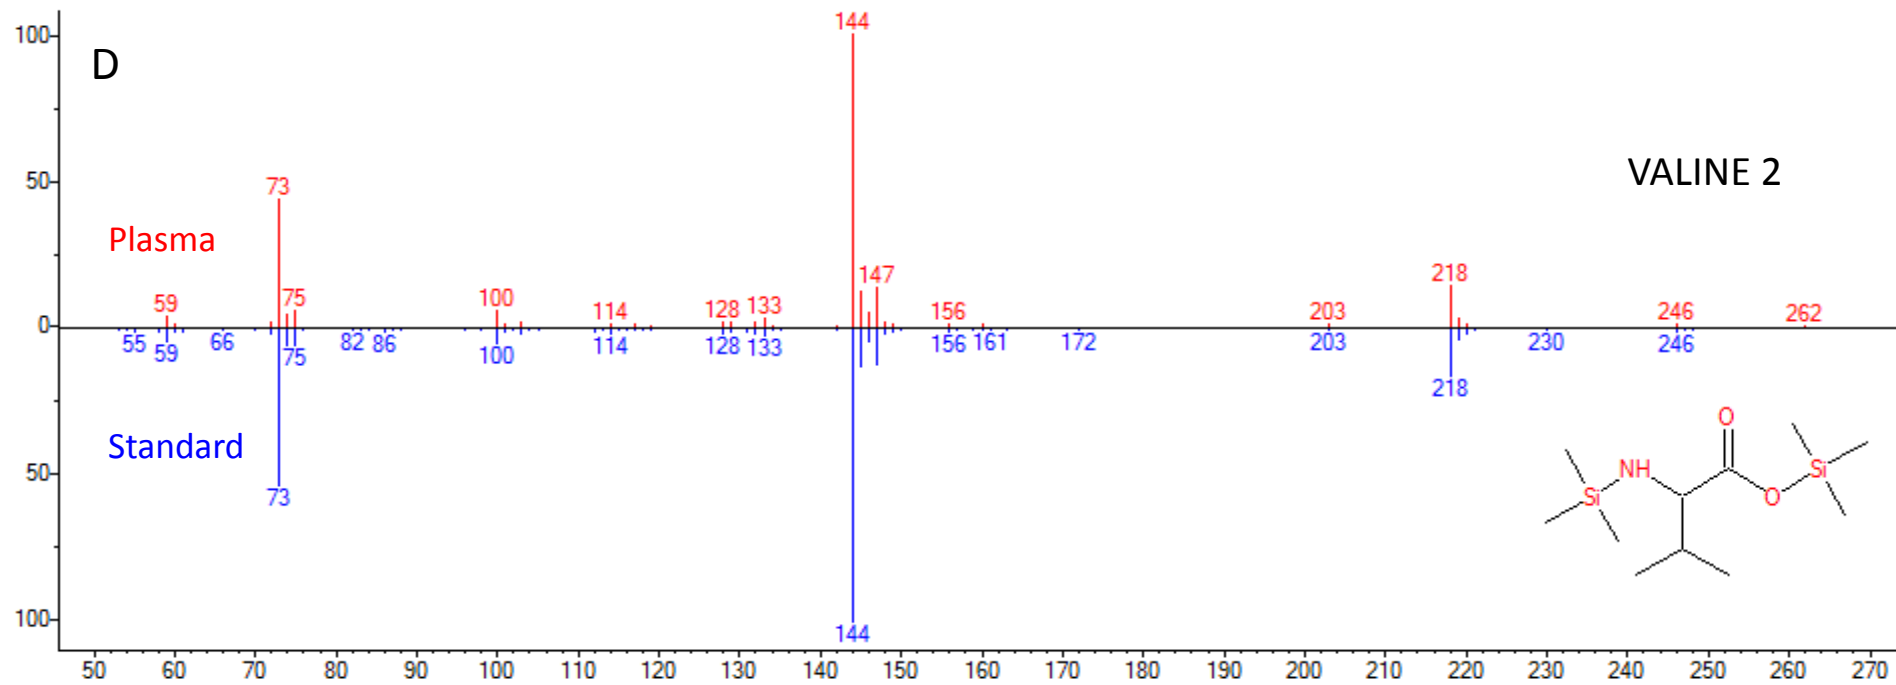

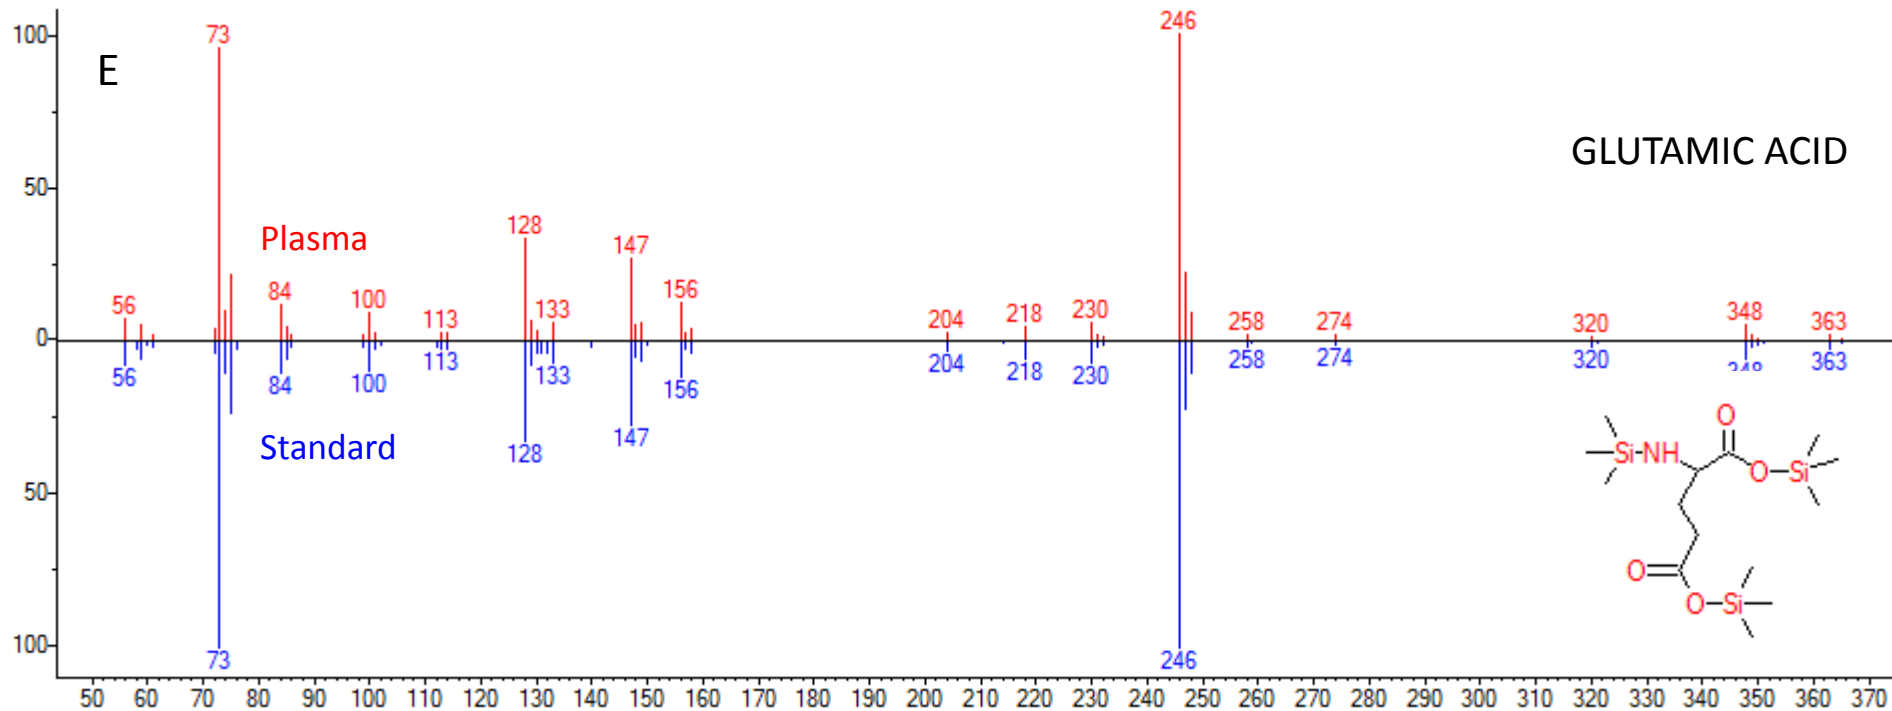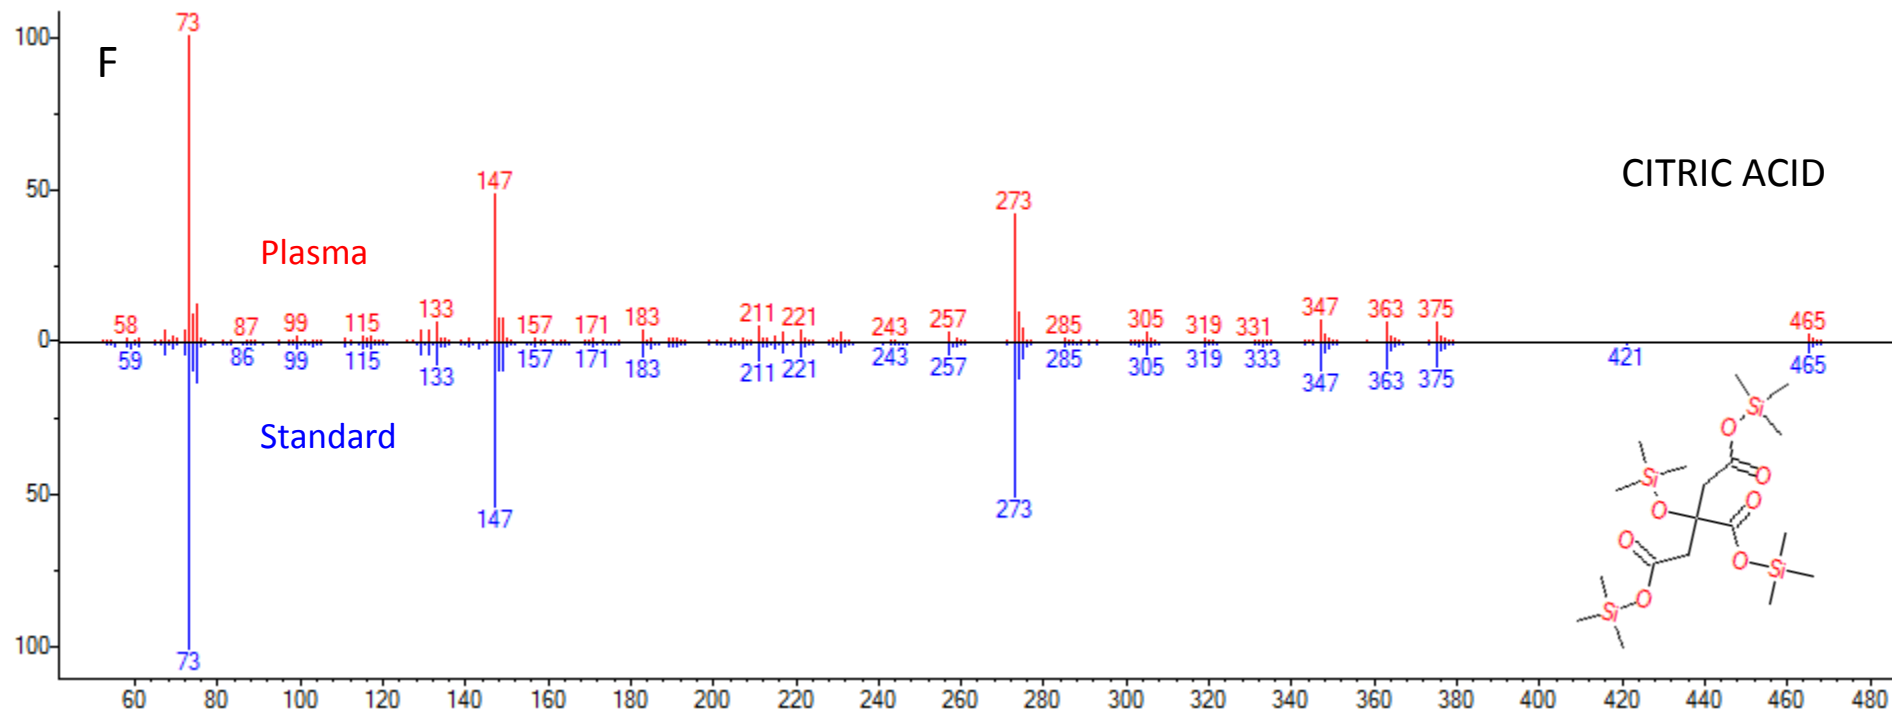

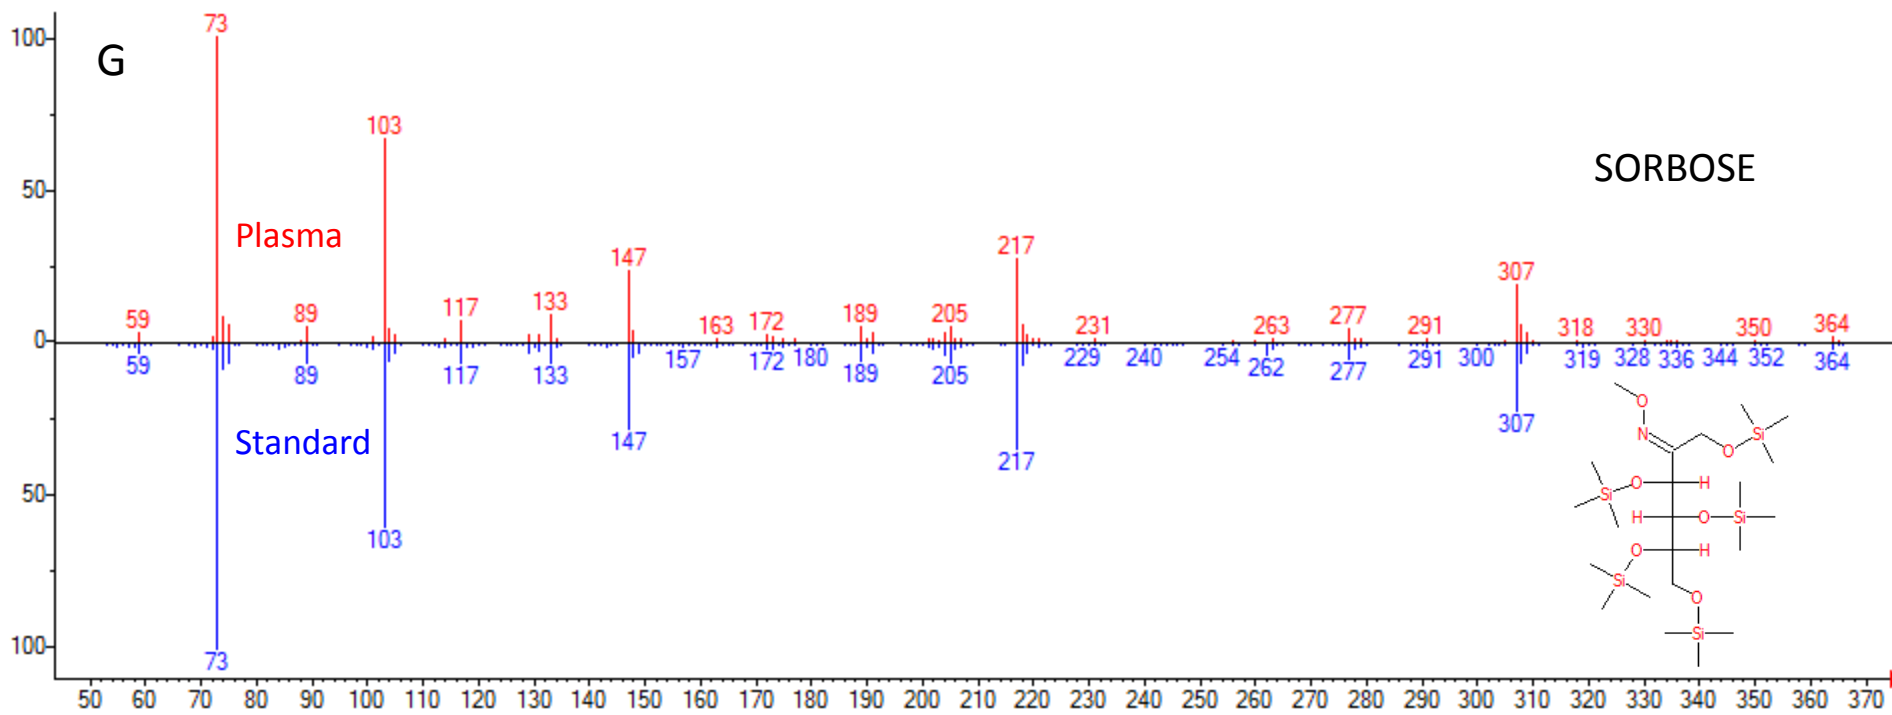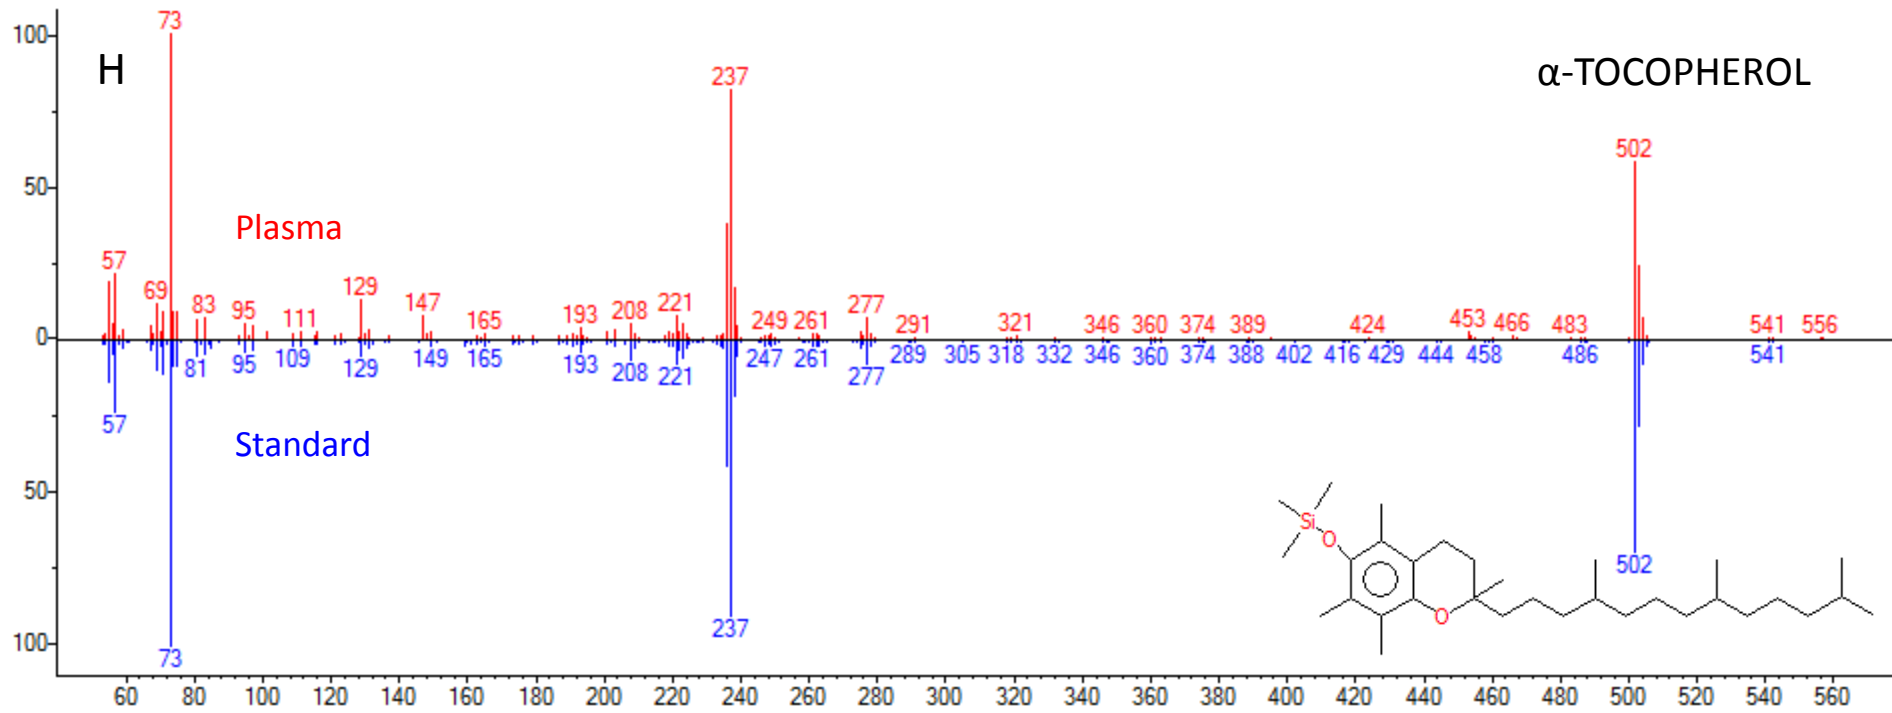

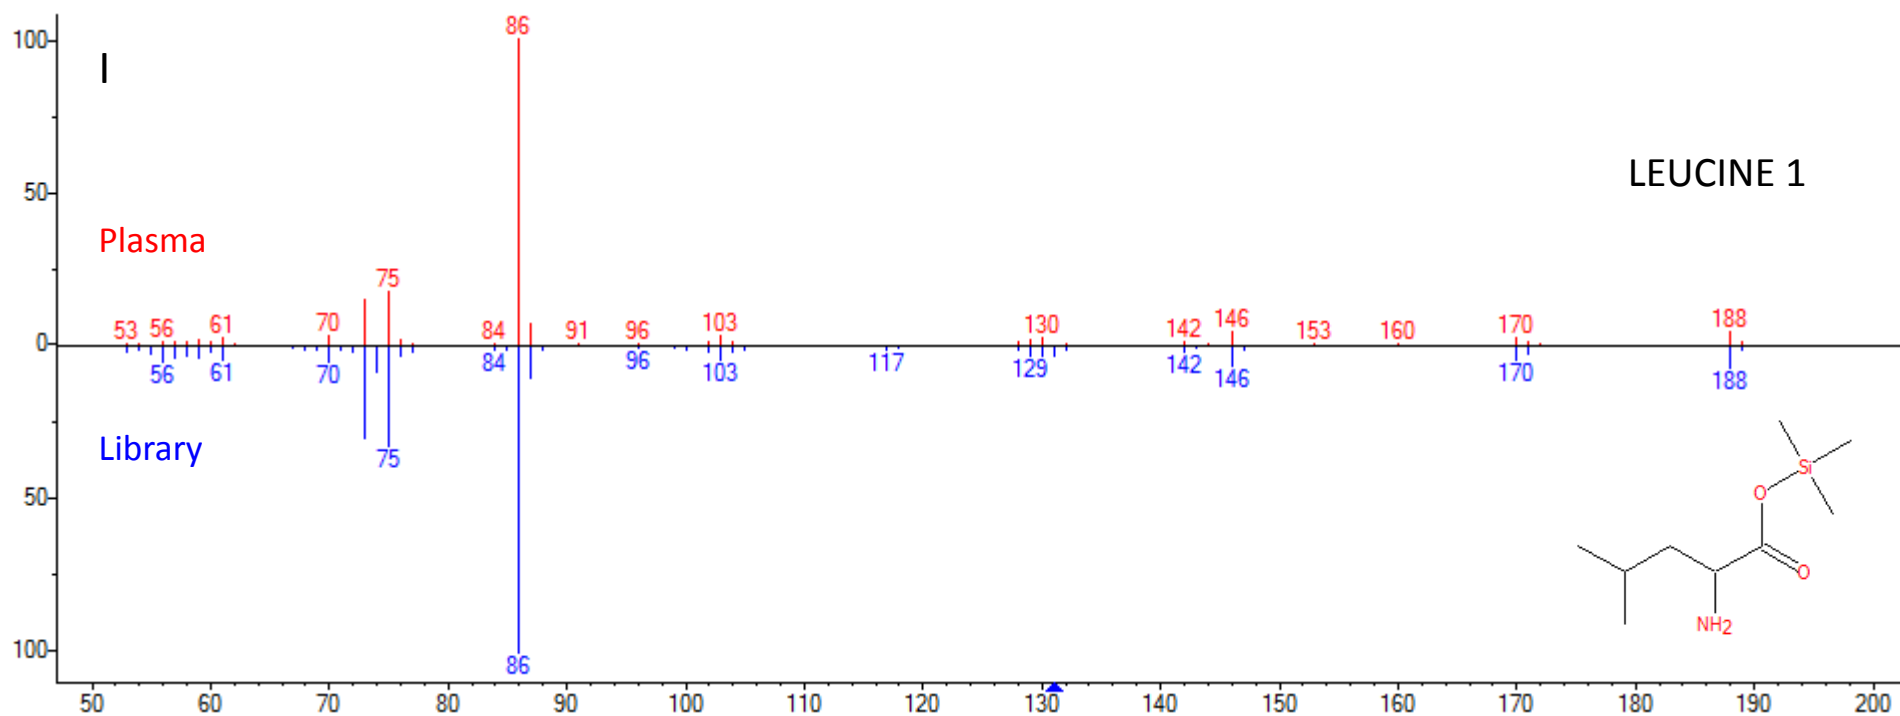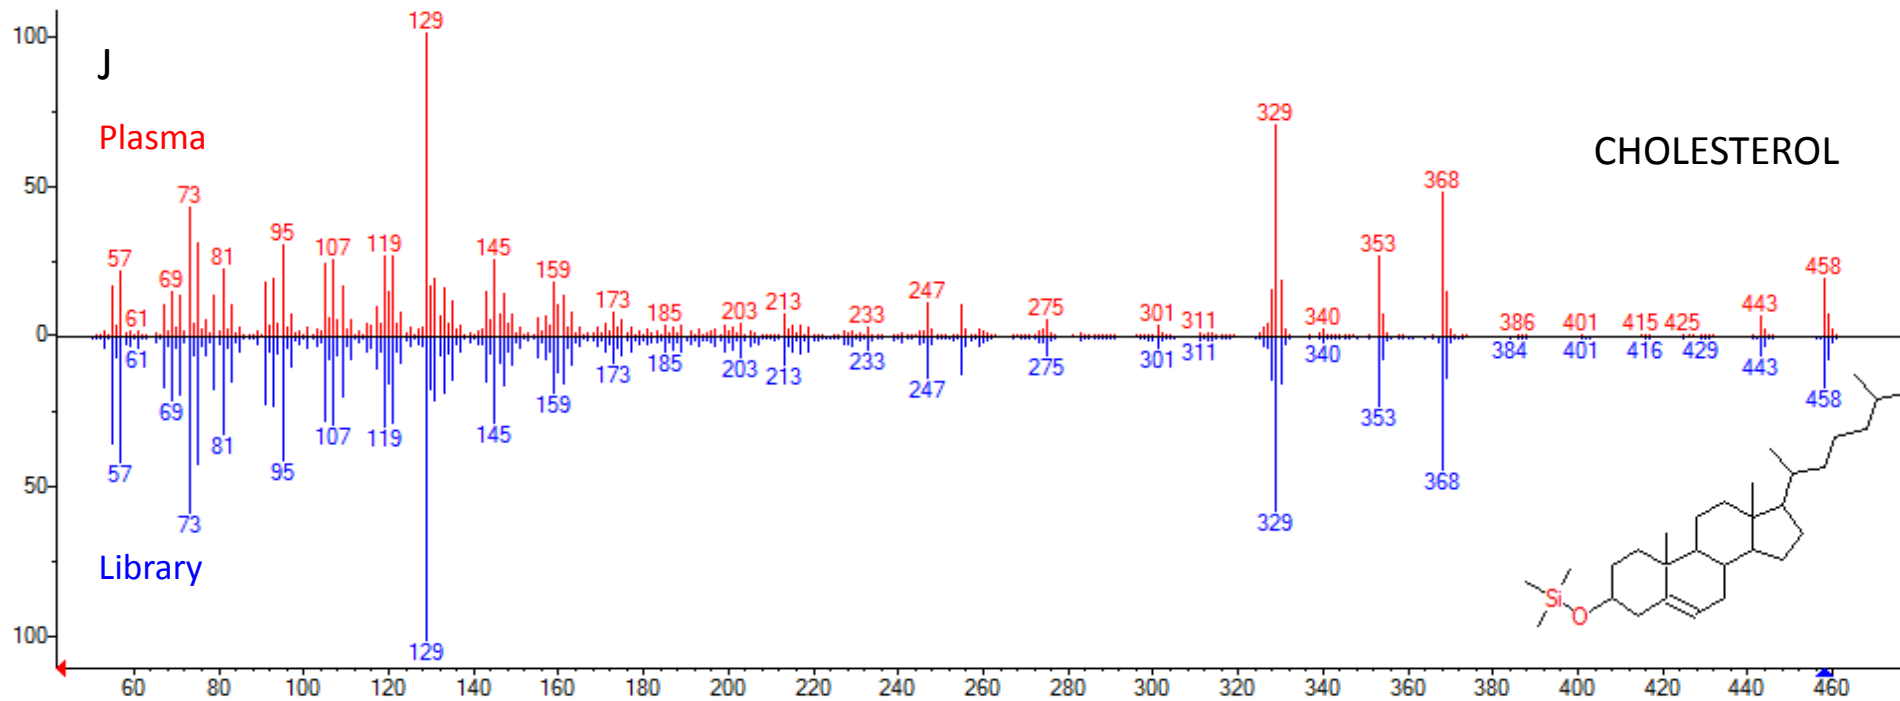

Figure S1. Confirmation of metabolites' identities using standards. Identities of the following seven metabolites found to be significant in the targeted analyses were confirmed by the analysis of authentic compounds purchased from Sigma Aldrich: L-glutamic acid (95436), DL- $\alpha$ -tocopherol (47783), L-valine (PHR1172), L-(+)-lactic acid (46937), D-(+)-sorbitol (S4887), DL-isoleucine (298689), and citric acid (94676). Individual 0.25 mg/mL stock standard solutions were prepared in appropriate solvent and stored at -20 °C until the analysis. Working standard solutions, at the concentration of 1.25  $\mu$ g/mL, were prepared by appropriate dilution of the stock standard solutions in acetonitrile, isopropanol, and water (3:3:2). Standards were then concentrated to dryness and derivatized following the same procedure as for the serum samples described in the material and method paragraph. Each standard was analyzed in both GCq and GC-TOF platform, following the same GC and MS methods as previously described in the "Acquisition of GC-MS Data by Untargeted Method" section. Acquired spectra of the individual standards were cross matched with the corresponding spectra extracted from analysis of plasma samples. Representative spectra of the comparisons between the plasma metabolites and the standards are shown in Panels A-G. For two metabolites (leucine 1 and cholesterol), the comparisons were made between spectra from plasma samples and reference spectra extracted from the Fiehn library as illustrated in Panels H & I.
